# Supplementary material
Source: HighWire-hosted journal article supplement (https://jech.bmj.com/content/73/1/3)
Supplement: inline-supplementary-material-1 [file inline-supplementary-material-1.pdf]

Table S1: ICD-10 codes used to define cancer sites in this study

| Cancer site                         | ICD-10 code                                                                    |
|-------------------------------------|--------------------------------------------------------------------------------|
| Anal                                | C21.0-C21.2, C21.8                                                             |
| Acute lymphoblastic leukaemia (ALL) | C90.1                                                                          |
| Acute myeloid leukaemia (AML)       | C92.0, C92.4, C92.5, C93.0, C94.0, C94.2                                       |
| Bladder                             | C67.0-C67.9                                                                    |
| Brain                               | C71.0-C71.9                                                                    |
| Breast                              | C50.0-C50.6, C50.8-C50.9                                                       |
| Cancer of Unknown primary (CUP)     | C77.0-C77.5, C77.8-C78.8, C79.0-C79.8, C80                                     |
| Cervical                            | C53.0, C53.1, C53.8, C53.9                                                     |
| Chronic lymphocytic leukaemia (CLL) | C91.1                                                                          |
| Chronic myeloid leukaemia (CML)     | C921                                                                           |
| Colon                               | C18.0-C18.9                                                                    |
| Hodgkin's Lymphoma (HL)             | C81.0-C81.3, C81.7, C81.9                                                      |
| Laryngeal                           | C32.0-C32.3, C32.8, C32.9                                                      |
| Liver                               | C22.0-C22.4, C22.7, C22.9                                                      |
| Lung                                | C33, C34.0-C34.3, C34.8, C34.9                                                 |
| Melanoma                            | C43                                                                            |
| Mesothelioma                        | C45.0-C45.2, C45.7, C45.9                                                      |
| Multiple Myeloma                    | C90.0-C90.2                                                                    |
| Non-Hodgkin's Lymphoma (NHL)        | C82.0-C82.2, C82.7, C82.9-C84.5, C85.0, C85.1, C85.7, C85.9                    |
| Oesophageal                         | C15.0-C15.5, C15.8, C15.9                                                      |
| Oral                                | C02.0-C02.4, C02.8-C03.1, C03.9-C04.1, C04.8, C04.9, C06.0-C06.2, C06.8, C06.9 |
| Oropharyngeal                       | C01, C09.0, C09.1, C09.8-C10.4, C10.8, C10.9                                   |
| Ovarian                             | C56, C57.0-C57.4, C57.7, C57.9                                                 |
| Pancreatic                          | C25.0-C25.4, C25.7-C25.9                                                       |
| Prostate                            | C61                                                                            |
| Rectal                              | C19-C20                                                                        |
| Renal                               | C64                                                                            |
| Sarcoma*                            | C49.0-C49.6, C49.8, C49.9                                                      |
| Small intestine                     | C17.0-C17.3, C17.8, C17.9                                                      |
| Stomach                             | C16.0-C16.6, C16.8, C16.9                                                      |
| Testicular                          | C62.0, C62.1, C62.9                                                            |
| Thyroid                             | C73                                                                            |
| Uterine                             | C54.0-C54.3, C54.8, C54.9, C55                                                 |

\*Both soft and connective tissue.

Table S2: Crude proportion, and crude and adjusted odds ratios (ORs) for diagnosis through emergency presentation\*, by sex, age group, deprivation quintile, cancer diagnosis, in 2006-2013

|                      | All cases | Number | (Crude %) | ORs   |              |          |              |
|----------------------|-----------|--------|-----------|-------|--------------|----------|--------------|
|                      |           |        |           | Crude | (95% CI)     | Adjusted | (95% CI)     |
| <b>All cases</b>     | 2042192   | 441645 | (21.6)    | .     |              | .        |              |
| <b>Sex</b>           |           |        |           |       |              |          |              |
| Female               | 1005312   | 208275 | (20.7)    | (ref) |              |          |              |
| Male                 | 1036880   | 233370 | (22.5)    | 1.1   | (1.1, 1.1)   | 0.9      | (0.9, 1.0)   |
| <b>Age</b>           |           |        |           |       |              |          |              |
| 25-49y               | 205239    | 25479  | (12.4)    | 0.5   | (0.5, 0.5)   | 0.7      | (0.7, 0.7)   |
| 50-59y               | 278722    | 39420  | (14.1)    | 0.6   | (0.6, 0.6)   | 0.7      | (0.7, 0.7)   |
| 60-69y               | 525372    | 83604  | (15.9)    | 0.7   | (0.7, 0.7)   | 0.7      | (0.7, 0.7)   |
| 70-79y               | 572253    | 126735 | (22.1)    | (ref) |              |          |              |
| 80+y                 | 460606    | 166407 | (36.1)    | 2.0   | (2.0, 2.0)   | 2.0      | (2.0, 2.0)   |
| <b>Deprivation</b>   |           |        |           |       |              |          |              |
| Least                | 410154    | 71435  | (17.4)    | (ref) |              |          |              |
| 2                    | 443197    | 86487  | (19.5)    | 1.1   | (1.1, 1.1)   | 2.0      | (2.0, 2.0)   |
| 3                    | 430859    | 92035  | (21.4)    | 1.3   | (1.3, 1.3)   | 1.1      | (1.1, 1.1)   |
| 4                    | 400761    | 95824  | (23.9)    | 1.5   | (1.5, 1.5)   | 1.2      | (1.2, 1.2)   |
| Most                 | 357221    | 95864  | (26.8)    | 1.7   | (1.7, 1.7)   | 1.3      | (1.3, 1.4)   |
| <b>Cancer site**</b> |           |        |           |       |              |          |              |
| Melanoma             | 81936     | 1947   | (2.4)     | 0.06  | (0.06, 0.06) | 0.07     | (0.07, 0.07) |
| Breast               | 329884    | 14400  | (4.4)     | 0.11  | (0.11, 0.11) | 0.12     | (0.12, 0.12) |
| Oral                 | 18211     | 1066   | (5.9)     | 0.14  | (0.13, 0.15) | 0.19     | (0.17, 0.20) |
| Thyroid              | 16512     | 1136   | (6.9)     | 0.17  | (0.16, 0.18) | 0.23     | (0.21, 0.24) |
| Uterine              | 53916     | 4323   | (8.0)     | 0.20  | (0.19, 0.21) | 0.23     | (0.22, 0.24) |
| Oropharyngeal        | 13496     | 899    | (6.7)     | 0.17  | (0.16, 0.18) | 0.23     | (0.21, 0.25) |
| Testicular           | 12665     | 1158   | (9.1)     | 0.23  | (0.22, 0.24) | 0.37     | (0.35, 0.39) |
| Prostate             | 280332    | 24615  | (8.8)     | 0.22  | (0.22, 0.22) | 0.25     | (0.24, 0.25) |
| Cervical             | 19474     | 2097   | (10.8)    | 0.28  | (0.27, 0.29) | 0.36     | (0.34, 0.37) |
| Laryngeal            | 14554     | 1512   | (10.4)    | 0.27  | (0.26, 0.29) | 0.31     | (0.29, 0.32) |
| Anal                 | 7310      | 933    | (12.8)    | 0.34  | (0.32, 0.36) | 0.38     | (0.36, 0.41) |
| Sarcoma***           | 10080     | 1368   | (13.6)    | 0.37  | (0.35, 0.39) | 0.42     | (0.39, 0.44) |
| HL                   | 9387      | 1513   | (16.1)    | 0.45  | (0.43, 0.48) | 0.60     | (0.57, 0.64) |
| Rectal               | 92024     | 12886  | (14.0)    | 0.38  | (0.37, 0.39) | 0.40     | (0.39, 0.41) |
| Bladder              | 69989     | 12763  | (18.2)    | 0.52  | (0.51, 0.53) | 0.48     | (0.47, 0.49) |
| Oesophageal          | 54923     | 11525  | (21.0)    | 0.62  | (0.61, 0.63) | 0.63     | (0.61, 0.64) |
| CLL                  | 21540     | 4536   | (21.1)    | 0.62  | (0.60, 0.64) | 0.63     | (0.61, 0.66) |
| NHL                  | 78623     | 20194  | (25.7)    | 0.81  | (0.79, 0.83) | 0.91     | (0.89, 0.93) |
| Renal                | 54545     | 13279  | (24.3)    | 0.75  | (0.73, 0.77) | 0.85     | (0.83, 0.86) |
| Ovarian              | 47162     | 13751  | (29.2)    | 0.96  | (0.94, 0.98) | 1.10     | (1.08, 1.13) |
| Colon                | 171142    | 51371  | (30.0)    | (ref) |              |          |              |
| Stomach              | 48164     | 15561  | (32.3)    | 1.11  | (1.09, 1.13) | 1.05     | (1.03, 1.08) |

|                  |        |        |        |      |              |                   |              |
|------------------|--------|--------|--------|------|--------------|-------------------|--------------|
| CML              | 4365   | 1369   | (31.4) | 1.07 | (1.00, 1.14) | 1.22              | (1.14, 1.30) |
| Mesothelioma     | 17564  | 5920   | (33.7) | 1.19 | (1.15, 1.23) | 1.26              | (1.22, 1.30) |
| Multiple Myeloma | 32355  | 11090  | (34.3) | 1.22 | (1.19, 1.25) | 1.28              | (1.25, 1.31) |
| Lung             | 275164 | 101853 | (37.0) | 1.37 | (1.35, 1.39) | 1.37              | (1.36, 1.39) |
| Liver            | 27601  | 12554  | (45.5) | 1.95 | (1.90, 2.00) | 2.05              | (2.00, 2.11) |
| Small intestinal | 7736   | 3559   | (46.0) | 1.99 | (1.90, 2.08) | 2.31              | (2.21, 2.42) |
| Pancreatic       | 57510  | 27316  | (47.5) | 2.11 | (2.07, 2.15) | 2.17              | (2.13, 2.21) |
| AML              | 17952  | 9344   | (52.0) | 2.53 | (2.45, 2.61) | 2.77              | (2.68, 2.86) |
| ALL              | 1652   | 935    | (56.6) | 3.04 | (2.75, 3.36) | 4.16              | (3.77, 4.60) |
| CUP              | 65339  | 37005  | (56.6) | 3.04 | (2.98, 3.10) | 2.85              | (2.80, 2.91) |
| Brain            | 29085  | 17867  | (61.4) | 3.71 | (3.61, 3.81) | 4.88              | (4.75, 5.01) |
| <hr/>            |        |        |        |      |              |                   |              |
| Year             |        |        |        |      |              |                   |              |
| 2006             | 237415 | 56551  | (23.8) |      |              |                   |              |
| 2007             | 240106 | 54507  | (22.7) |      |              |                   |              |
| 2008             | 247026 | 55122  | (22.3) |      |              |                   |              |
| 2009             | 252567 | 55168  | (21.8) | 0.97 | (0.97, 0.97) | 0.97 <sup>†</sup> | (0.97, 0.97) |
| 2010             | 255146 | 53515  | (21.0) |      |              |                   |              |
| 2011             | 261421 | 54804  | (21.0) |      |              |                   |              |
| 2012             | 271942 | 56665  | (20.8) |      |              |                   |              |
| 2013             | 276569 | 55313  | (20.0) |      |              |                   |              |

ALL = Acute Lymphoblastic Leukaemia; AML = Acute Myeloid Leukaemia; CI = Confidence Interval; CLL = Chronic Lymphocytic Leukaemia; CML = Chronic Myeloid Leukaemia; CUP = Cancer of Unknown Primary; HL = Hodgkin's Lymphoma; NHL = Non-Hodgkin's Lymphoma; OR = Odds Ratio; ref = reference category

\*Adjusted odds ratios estimated from a multivariable logistic regression model where outcome is emergency presentation (vs. non-emergency presentation), and independent variables are sex, age group, deprivation, cancer site, and year (as a continuous variable).

\*\*In ascending order of proportions of emergency presentations in 2006 – see Table 1.

\*\*\*Both soft and connect tissue

†When fitting the same model but treating year of diagnosis as a categorical variable, the following adjusted OR estimates (all vs. 2006) for 2007, 2008, 2009, 2010, 2011, 2012, and 2013 were: 0.93, 0.91, 0.90, 0.86, 0.85, 0.84, and 0.80, respectively, without noticeable change in the OR values for all other variables. Based on this preliminary analysis, we treated year of diagnosis as a continuous variable for all subsequent analyses.

Figure S1. Adjusted odds ratio of emergency presentation\* by age group (left) and deprivation group (right) by year.

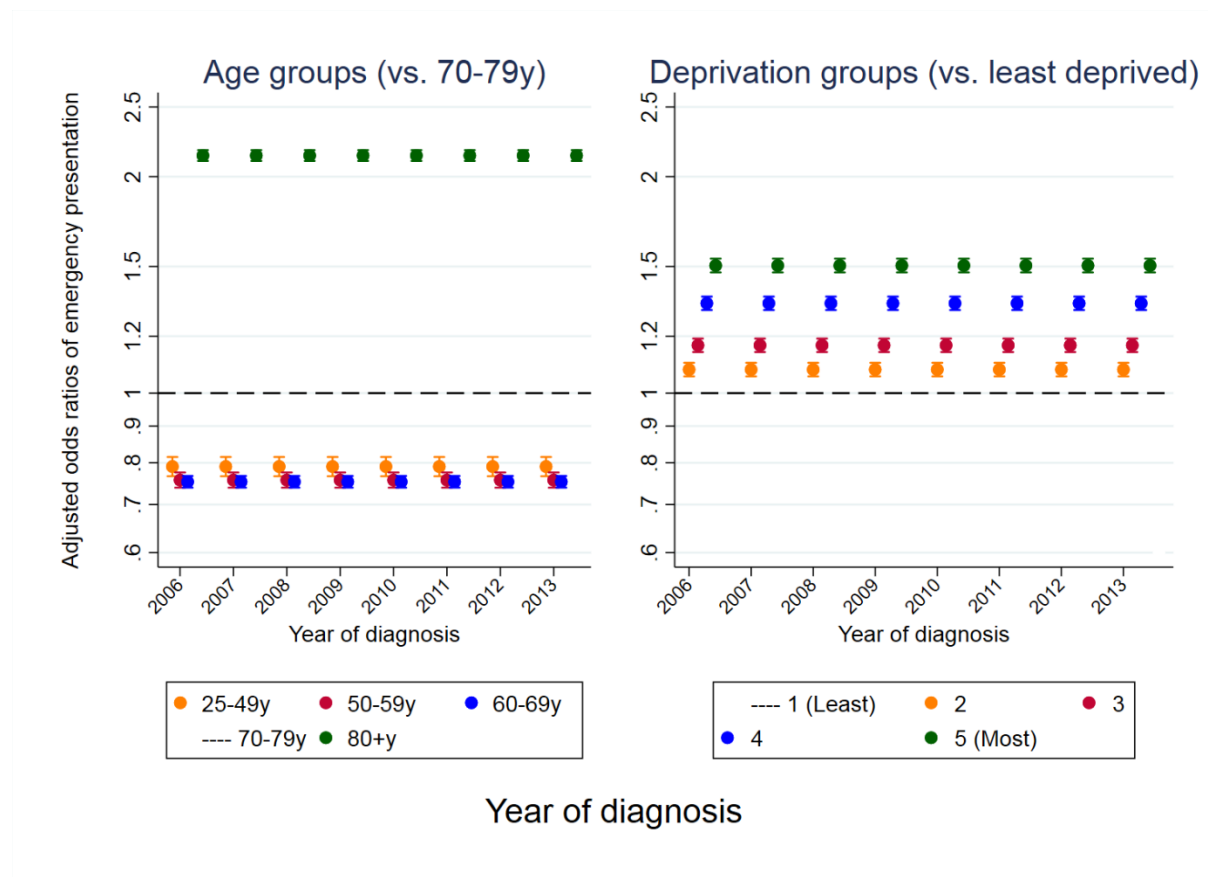

\*Adjusted odds ratios derived from logistic regression model where outcome is emergency presentation and independent variables are sex, age group, deprivation, cancer site, year, and interaction terms for sex\*year, age group\*year, deprivation group\*year and cancer site\*year (year entered as a continuous variable both in main and interaction terms).

Figure S2. Trends in adjusted proportion of emergency presentation\* by cancer site for percentages in 2006 that are less than 25 (y-axis on logarithmic scale).

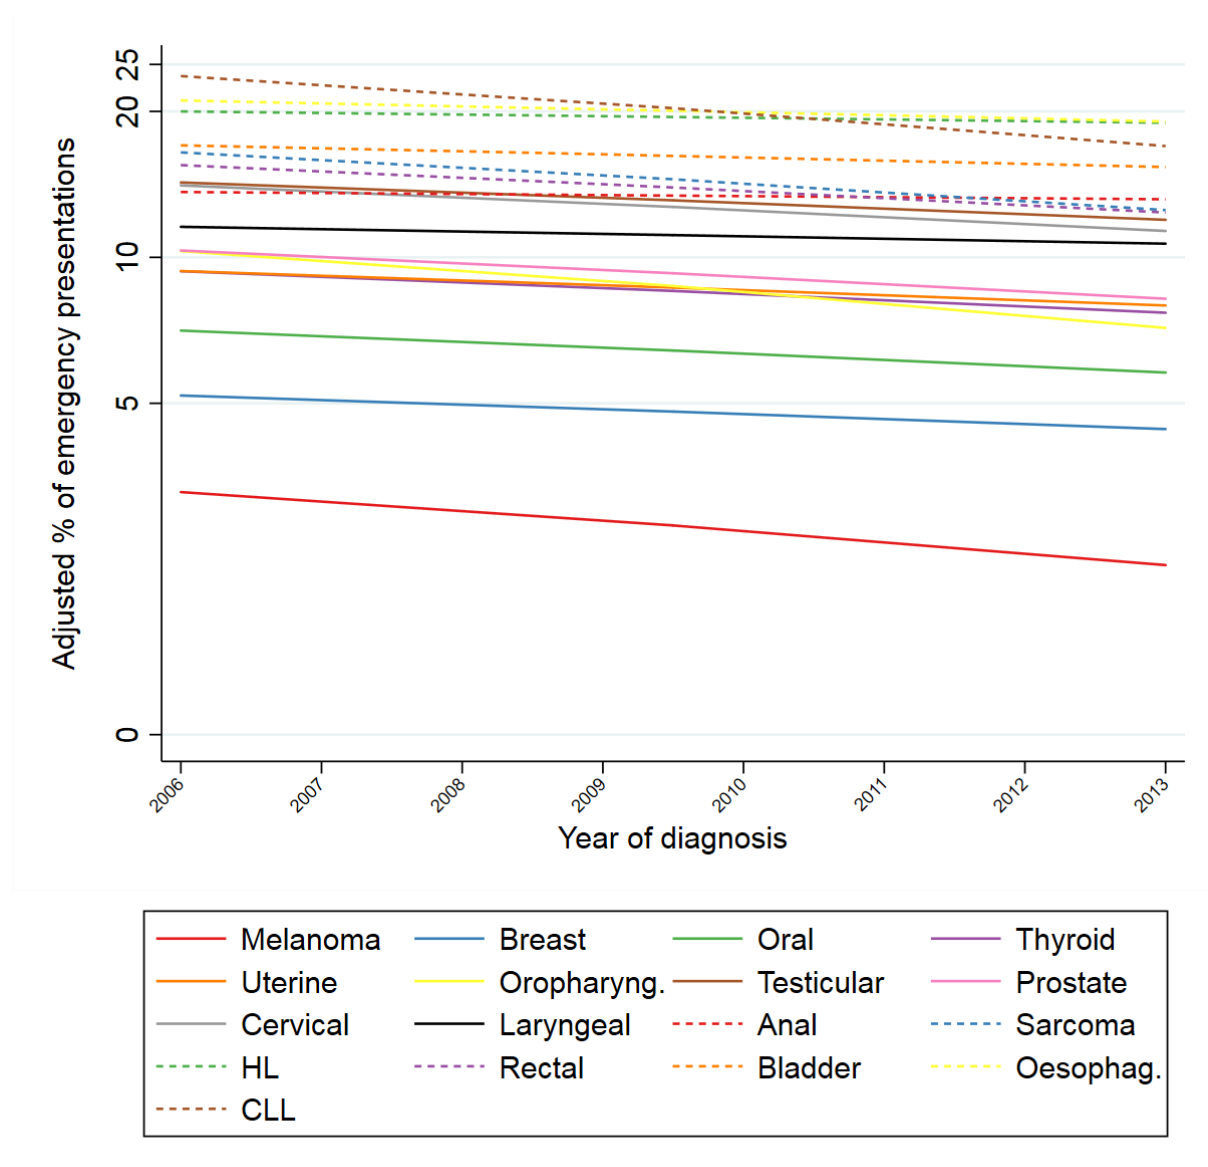

CLL = Chronic Lymphocytic Leukaemia; HL = Hodgkin's Lymphoma; Oesophag. = Oesophageal; Oropharyng. = Oropharyngeal  
 \*Adjusted proportions derived from logistic regression model where outcome is emergency presentation and independent variables are sex, age group, deprivation, cancer site, year, and interaction terms for sex\*year, age group\*year, deprivation group\*year and cancer site\*year (year entered as a continuous variable both in main and interaction terms). These adjusted proportions were estimated given a case-mix in each year that was distributed as for the entire study period.

Figure S3. Trends in adjusted proportion of emergency presentation\* by cancer site for percentages in 2006 that are 25 or greater (y-axis on logarithmic scale).

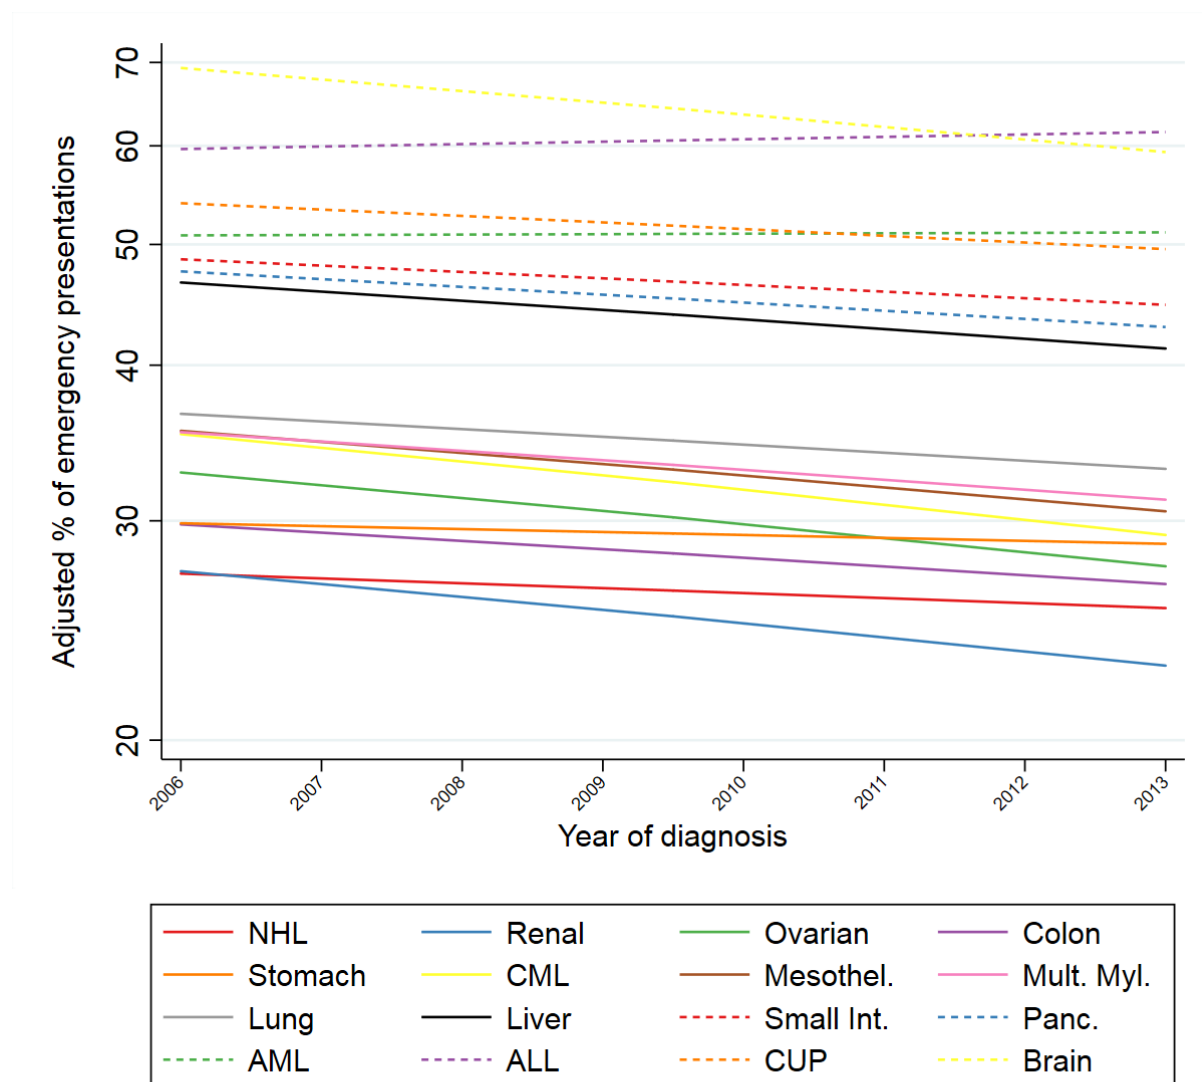

ALL = Acute Lymphoblastic Leukaemia; AML = Acute Myeloid Leukaemia; CML = Chronic Myeloid Leukaemia; CUP = Cancer of Unknown Primary; Mesothel. = Mesothelioma; Mult. Myl. = Multiple Myeloma; NHL = Non-Hodgkin's Lymphoma; Panc. = Pancreatic; Small Int. = Small Intestinal

\*Adjusted proportions derived from logistic regression model where outcome is emergency presentation and independent variables are sex, age group, deprivation, cancer site, year, and interaction terms for sex\*year, age group\*year, deprivation group\*year and cancer site\*year (year entered as a continuous variable both in main and interaction terms). These adjusted proportions were estimated given a case-mix in each year that was distributed as for the entire study period.

Table S3: Adjusted proportions of emergency presentations (EPs)\* for patients diagnosed in 2006 and 2013 - when model includes year as a continuous variable and as a categorical variable, respectively

|                   | 2006                                    |                                           | 2013                                    |                                           |
|-------------------|-----------------------------------------|-------------------------------------------|-----------------------------------------|-------------------------------------------|
|                   | Adjusted %<br>when year<br>continuous** | Adjusted %<br>when year<br>categorical*** | Adjusted %<br>when year<br>continuous** | Adjusted %<br>when year<br>categorical*** |
| <b>All cases</b>  | 23.0                                    | 23.4                                      | 20.4                                    | 20.4                                      |
| Sex               |                                         |                                           |                                         |                                           |
| Female            | 23.4                                    | 23.6                                      | 20.8                                    | 20.8                                      |
| Male              | 22.7                                    | 23.2                                      | 20.0                                    | 20.0                                      |
| Age-group (years) |                                         |                                           |                                         |                                           |
| 25-49             | 16.6                                    | 17.3                                      | 16.0                                    | 16.4                                      |
| 50-59             | 17.1                                    | 17.8                                      | 15.5                                    | 15.8                                      |
| 60-69             | 18.2                                    | 18.6                                      | 15.4                                    | 15.5                                      |
| 70-79             | 22.6                                    | 22.9                                      | 18.9                                    | 18.9                                      |
| 80+               | 33.3                                    | 33.5                                      | 30.7                                    | 30.4                                      |
| Deprivation       |                                         |                                           |                                         |                                           |
| 1 (Least)         | 19.9                                    | 20.2                                      | 17.9                                    | 17.8                                      |
| 2                 | 21.5                                    | 21.8                                      | 18.9                                    | 18.8                                      |
| 3                 | 22.6                                    | 23.1                                      | 19.9                                    | 20.0                                      |
| 4                 | 24.3                                    | 24.7                                      | 21.7                                    | 21.7                                      |
| 5 (Most)          | 26.9                                    | 27.4                                      | 23.5                                    | 23.7                                      |
| Cancer site       |                                         |                                           |                                         |                                           |
| Melanoma          | 3.3                                     | 3.3                                       | 2.3                                     | 2.2                                       |
| Breast            | 5.2                                     | 5.3                                       | 4.4                                     | 4.2                                       |
| Oral              | 7.1                                     | 7.5                                       | 5.8                                     | 5.5                                       |
| Thyroid           | 9.4                                     | 10.3                                      | 7.7                                     | 8.2                                       |
| Uterus            | 9.4                                     | 9.5                                       | 8.0                                     | 7.7                                       |
| Oropharyngeal     | 10.4                                    | 11.9                                      | 7.2                                     | 7.4                                       |
| Testicular        | 14.3                                    | 14.8                                      | 12.0                                    | 11.2                                      |
| Prostate          | 10.4                                    | 10.6                                      | 8.2                                     | 8.5                                       |
| Cervical          | 14.1                                    | 13.8                                      | 11.4                                    | 11.5                                      |
| Laryngeal         | 11.6                                    | 12.9                                      | 10.7                                    | 11.0                                      |
| Anal              | 13.6                                    | 13.4                                      | 13.2                                    | 13.5                                      |
| Sarcoma           | 16.5                                    | 16.4                                      | 12.6                                    | 11.6                                      |
| HL                | 20.0                                    | 19.3                                      | 19.0                                    | 19.0                                      |
| Rectal            | 15.5                                    | 15.8                                      | 12.4                                    | 12.9                                      |
| Bladder           | 17.0                                    | 18.1                                      | 15.4                                    | 15.8                                      |
| Oesophageal       | 21.1                                    | 22.0                                      | 19.1                                    | 19.2                                      |
| CLL               | 23.8                                    | 24.0                                      | 17.1                                    | 16.1                                      |
| NHL               | 27.2                                    | 27.8                                      | 25.5                                    | 26.0                                      |
| Renal             | 27.4                                    | 27.8                                      | 23.0                                    | 21.9                                      |
| Ovarian           | 32.9                                    | 32.6                                      | 27.6                                    | 27.1                                      |
| Colon             | 29.8                                    | 31.4                                      | 26.7                                    | 27.9                                      |
| Stomach           | 29.9                                    | 30.5                                      | 28.7                                    | 29.9                                      |
| CML               | 35.2                                    | 35.6                                      | 29.3                                    | 28.6                                      |
| Mesothelioma      | 35.4                                    | 35.8                                      | 30.5                                    | 31.5                                      |
| Multiple          | 35.3                                    | 35.6                                      | 31.2                                    | 30.8                                      |
| Lung              | 36.6                                    | 36.7                                      | 33.0                                    | 32.8                                      |
| Liver             | 46.6                                    | 46.1                                      | 41.3                                    | 41.0                                      |
| Small intestine   | 48.6                                    | 49.1                                      | 44.7                                    | 45.3                                      |
| Pancreatic        | 47.6                                    | 48.0                                      | 42.9                                    | 42.4                                      |
| AML               | 50.8                                    | 52.7                                      | 51.1                                    | 51.1                                      |
| ALL               | 59.6                                    | 60.5                                      | 61.5                                    | 60.7                                      |
| CUP               | 54.0                                    | 54.8                                      | 49.6                                    | 49.9                                      |
| Brain             | 69.2                                    | 67.7                                      | 59.2                                    | 56.0                                      |

ALL = Acute Lymphoblastic Leukaemia; AML = Acute Myeloid Leukaemia; CLL = Chronic Lymphocytic Leukaemia; CML = Chronic Myeloid Leukaemia; CUP = Cancer of Unknown Primary; HL = Hodgkin's Lymphoma; NHL = Non-Hodgkin's Lymphoma

\*Adjusted proportions estimated from a multivariable logistic regression model where outcome is emergency presentation (vs. non-emergency presentation), and independent variables are sex, age group, deprivation, cancer site, year, age group\*year, deprivation\*year,

and cancer site\*year. These adjusted proportions were estimated given a case-mix in each year that was distributed as for the entire study period.

\*\*Year entered as continuous variable both for main and interaction terms.

\*\*\*Year entered as categorical variable both for main and interaction terms.

Table S4: Summary of age and deprivation inequalities as adjusted proportions and odds ratios of emergency presentations \*, in 2006 and 2013, and estimation of potentially avoidable (or 'excess') emergency presentations - when model includes year as a categorical variable

|                    | Adjusted % |      | Adjusted OR for<br>2013 vs. 2006 | No. of<br>emergency<br>presentations<br>in 2013 | <i>No. of emergency<br/>presentations in 2013<br/>that would be<br/>considered potentially<br/>avoidable (or 'excess'),<br/>given modest reductions<br/>in inequalities**</i> |
|--------------------|------------|------|----------------------------------|-------------------------------------------------|-------------------------------------------------------------------------------------------------------------------------------------------------------------------------------|
|                    | 2006       | 2013 |                                  |                                                 |                                                                                                                                                                               |
| <b>Age</b>         |            |      |                                  |                                                 |                                                                                                                                                                               |
| 25-49y             | 17.3       | 16.4 | 1.01                             | 3345                                            | 132                                                                                                                                                                           |
| 50-59y             | 17.8       | 15.8 | 0.92                             | 4961                                            | 95                                                                                                                                                                            |
| 60-69y             | 18.6       | 15.5 | 0.84                             | 10414                                           | -                                                                                                                                                                             |
| 70-79y             | 22.9       | 18.9 | 0.82                             | 15285                                           | 2800                                                                                                                                                                          |
| 80+y               | 33.5       | 30.4 | 0.92                             | 21308                                           | 7905                                                                                                                                                                          |
| <b>Total</b>       | -          | -    | --                               | <b>55313</b>                                    | <b>10931</b>                                                                                                                                                                  |
| <b>Deprivation</b> |            |      |                                  |                                                 |                                                                                                                                                                               |
| Least              | 20.2       | 17.8 | 0.82                             | 9253                                            | -                                                                                                                                                                             |
| 2 <sup>nd</sup>    | 21.8       | 18.8 | 0.79                             | 10836                                           | 545                                                                                                                                                                           |
| 3 <sup>rd</sup>    | 23.1       | 20.0 | 0.80                             | 11605                                           | 748                                                                                                                                                                           |
| 4 <sup>th</sup>    | 24.7       | 21.7 | 0.81                             | 11871                                           | 915                                                                                                                                                                           |
| Most               | 27.4       | 23.7 | 0.78                             | 11748                                           | 966                                                                                                                                                                           |
| <b>Total</b>       | -          | -    | -                                | <b>55313</b>                                    | <b>3175</b>                                                                                                                                                                   |

OR = Odds ratio

\*Adjusted proportions and odds ratios estimated from a multivariable logistic regression model where outcome is emergency presentation (vs. non-emergency presentation), and independent variables are sex, age group, deprivation, cancer site, year, sex\*year, age group\*year, deprivation\*year, and cancer site\*year (year entered as categorical variable both for main and interaction terms). Adjusted proportions were estimated given a case-mix in each year that was distributed as for the entire study period.

\*\*Number of fewer cases of emergency presentation had each age and deprivation group had the same risk of emergency presentation as that of the adjacent group with a lower risk (e.g. had 50-59y olds in 2006 had the same risk as 25-49y olds, i.e. 17.3% rather than 17.8%). This was usually the younger age group or lower level deprivation group. However, for 2013, 50-59y olds had lower risks than 25-49y olds, and 60-69y olds had lower risks than 50-59y olds, and so in this year for 25-59y olds we assigned the risk of the next oldest age-group.

Figure S4: Time-trends in adjusted proportions of emergency presentations\*, by age group and by deprivation group - when model includes year as a categorical variable

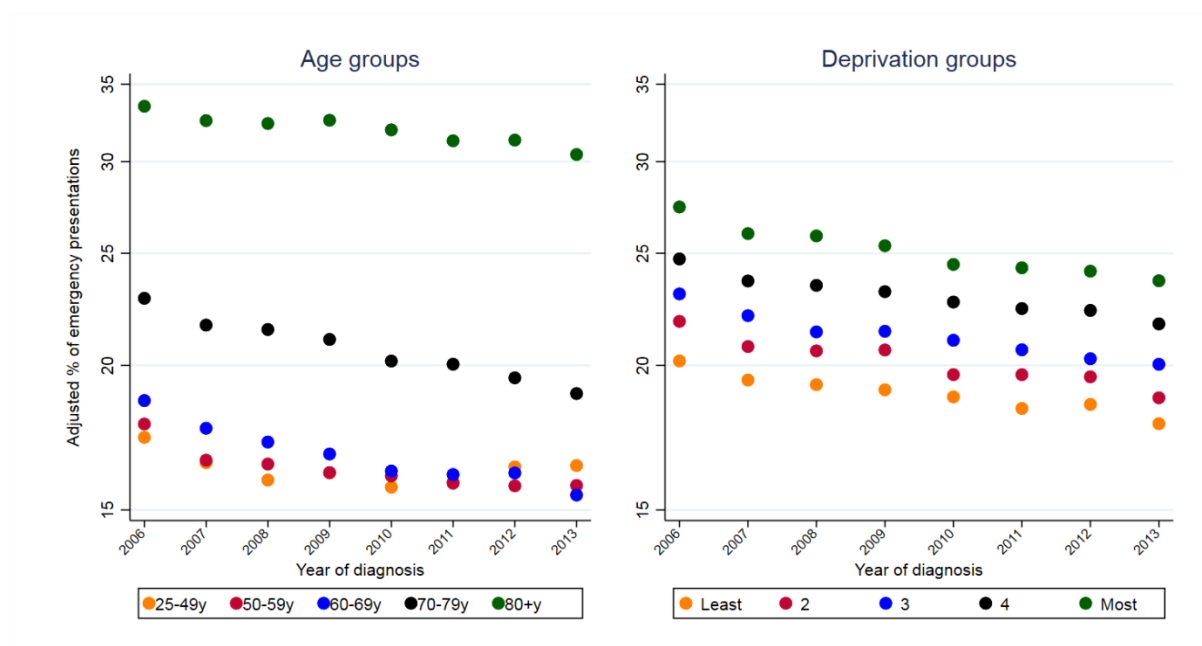

Trends are plotted on the log-proportions scale, to allow for a fair representation of *relative* changes over time between age and deprivation groups with different baseline frequency of emergency presentation.

\*Adjusted proportions derived from logistic regression model where outcome is emergency presentation and independent variables are sex, age group, deprivation, cancer site, year, and interaction terms for sex\*year, age group\*year, deprivation group\*year and cancer site\*year (year entered as a categorical variable both in main and interaction terms). These adjusted proportions were estimated such that the case-mix within each study year was fixed to be the same as for the entire study period.

Figure S5: Time-trends in adjusted proportions of emergency presentations\*, by cancer - when model includes year as a categorical variable

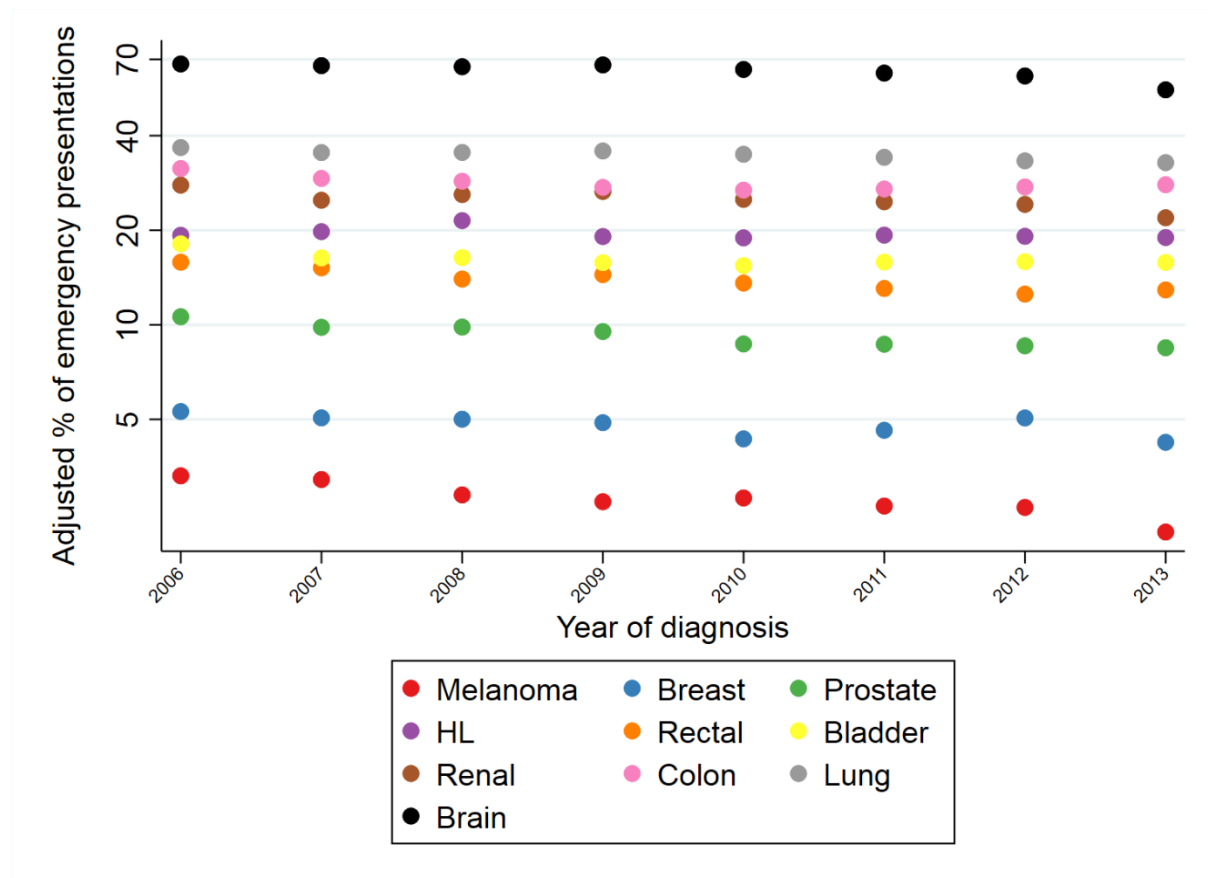

Trends are plotted on the log-proportions scale, to allow a fair representation of *relative* changes over time between cancer sites with different baseline frequency of emergency presentation.

H Lymph = Hodgkin's Lymphoma

\*Adjusted proportions derived from logistic regression model where outcome is emergency presentation and independent variables are sex, age group, deprivation, cancer site, year, and interaction terms for sex\*year, age group\*year, deprivation group\*year and cancer site\*year (year entered as a continuous variable both in main and interaction terms). These adjusted proportions were estimated such that the case-mix within each study year was fixed to be the same as for the entire study period.
